# Supplementary material for: Activation of the skeletogenic gene regulatory network in the early sea urchin embryo
Source: Oxford University Press journal article supplement (doi:10.1242/dev.048652), 2010-02-25
Supplement: dev048652tables1.pdf [file dev048652tables1.pdf]

**Table S1. PCR primers used**

| Primer name          | Primer sequence (5'-3') |
|----------------------|-------------------------|
| <i>Spalx1</i> F      | CACCCGTAGAGGGCGCTATA    |
| <i>Spalx1</i> R      | TGCTGGAGTCTTGCGATTCG    |
| <i>Spdelta</i> F     | ACGGAGCTACATGCCTGAAC    |
| <i>Spdelta</i> R     | TCACAATGGACCGAATCAGA    |
| <i>SphesC</i> F      | AGAGGGCGAGCTCGCATCAAC   |
| <i>SphesC</i> R      | CTGGGGTCTGGACGTCTTTC    |
| <i>Spz12</i> F       | AGTCGTCCAGCCATGTCTTT    |
| <i>Spz12</i> R       | AAGCACACCTCGCACCTATC    |
| <i>Lvalx1</i> F      | TGGAGAAGGTTTTCCAAAGG    |
| <i>Lvalx1</i> R      | CGTAACCAGATCCTGGTCCT    |
| <i>Lvdelta</i> F     | TTGCTCTGCATTGGATTAGC    |
| <i>Lvdelta</i> R     | GATATCCTTGGCTTGGTGGT    |
| <i>LvhesC</i> F      | AAGTACCACGCTGGCTTCAC    |
| <i>LvhesC</i> R      | GTGCTGCAACGATCAGCTAG    |
| <i>Lvpmar1</i> F     | CTGCTCACCAACCAGTCATT    |
| <i>Lvpmar1</i> R     | TGTCGTCTGGTTGACCTCAT    |
| <i>Lvubiquitin</i> F | CACAGGCAAGACTATCACTC    |
| <i>Lvubiquitin</i> R | GATAGAGTGCGGCCGTCCTC    |
